# Supplementary material for: Understanding the cation exchange affinity in modified-MMT catalysts for the conversion of glucose to lactic acid
Source: Royal Society of Chemistry journal article supplement (doi:10.1039/d3ra05071h), 2023-01-01
Supplement: d3ra05071h1.pdf [file d3ra05071h1.pdf]

# Understanding the Cation Exchange Affinity in Modified-MMT Catalysts for the Conversion of Glucose to Lactic Acid

S.M. Shahrul Nizan Shikh Zahari<sup>1,a,\*</sup>, Nur Fatin Izzati Che Sam<sup>1,\*</sup>, Kholoud M. H. Elzaneen<sup>1</sup>, Mahfuzah Samirah Ideris<sup>1</sup>, Farah Wahida Harun<sup>1</sup>, and Hazeeq Hazwan Azman<sup>2</sup>

## Electronic supporting information

Table S1. The structural properties of CE-MMTs by N<sub>2</sub>-BET.

| Catalyst | Pore volume (cm <sup>3</sup> g <sup>-1</sup> ) | Average pore diameter (nm) |
|----------|------------------------------------------------|----------------------------|
| S-MMT    | 0.378                                          | 9.43                       |
| Fe-MMT   | 0.506                                          | 11.67                      |
| Cu-MMT   | 0.520                                          | 10.36                      |
| Zn-MMT   | 0.613                                          | 19.82                      |

Table S2. Lewis acid (LA) and Brønsted acid (BA) sites of CE-MMTs estimated by pyridine-ATR-FTIR analysis.

| Catalyst | LA (u <sup>2</sup> ) | BA (u <sup>2</sup> ) |
|----------|----------------------|----------------------|
| S-MMT    | 46.02                | 10.5                 |
| Fe-MMT   | 8.17                 | 2.19                 |
| Cu-MMT   | 18.38                | 1.78                 |
| Zn-MMT   | 18.67                | 1.43                 |

\*The quantities of LA and LB surface sites were estimated by integrating area under peaks of pyridine FTIR spectra at 1445 - 1447 cm<sup>-1</sup> (pyridine bound to LA) and 1542 – 1558 cm<sup>-1</sup> (pyridine bound to BA) (see Figure S2).

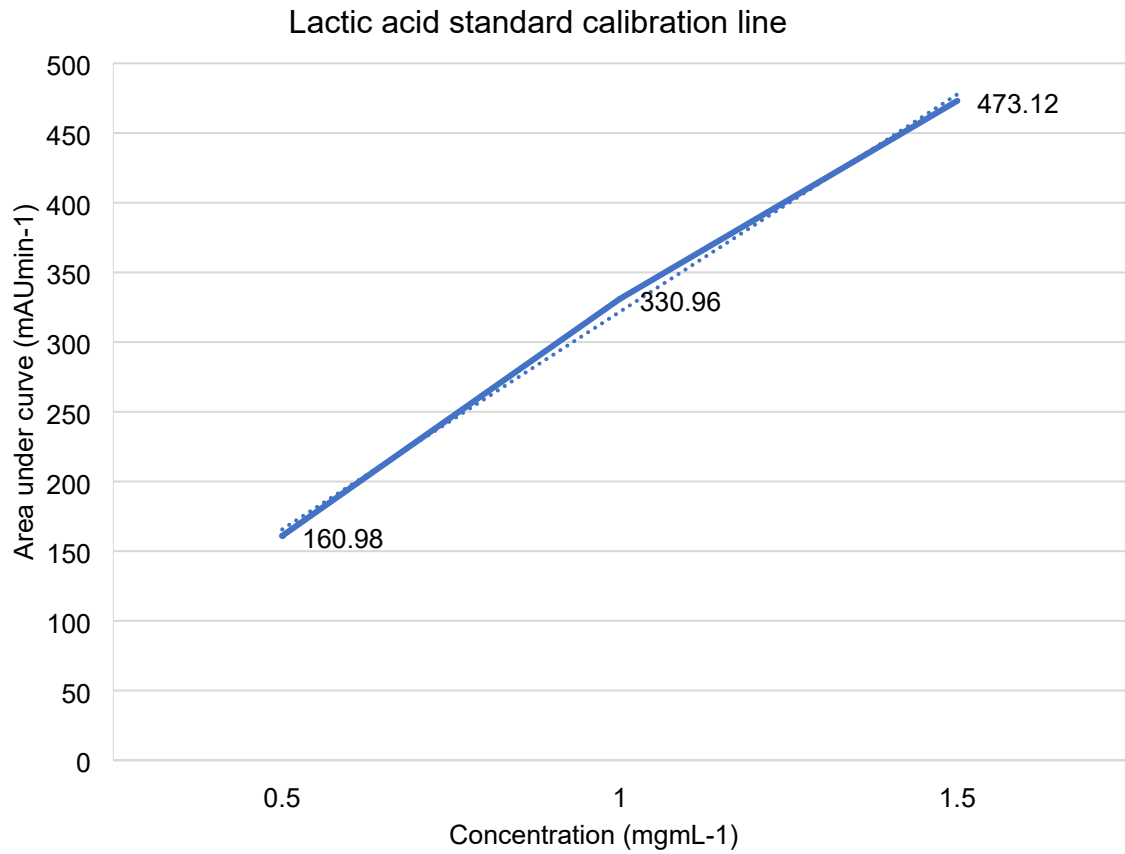

Figure S1. A standard calibration curve for standard solutions of lactic acid analysed by HPLC.

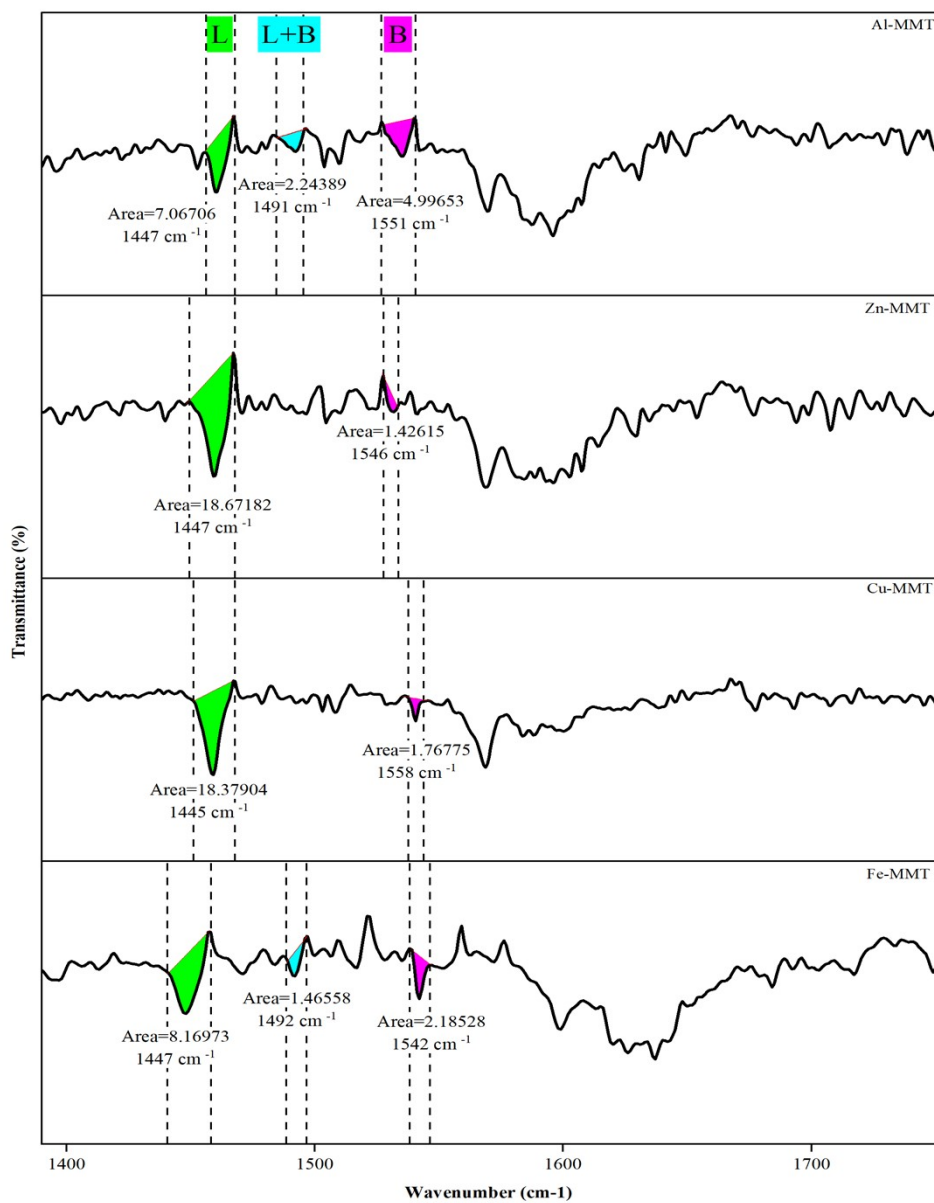

Figure S2. Integration of area under peaks for pyridine-FTIR spectra at 1445 - 1447 cm<sup>-1</sup> (pyridine bound to Lewis acid) and 1542 - 1558 cm<sup>-1</sup> (pyridine bound to Brønsted acid).
